# Supplementary material for: The optimization effect of different parameters on the super hydrophobicity of prickly-shaped carbonyl iron particles
Source: Royal Society of Chemistry journal article supplement (doi:10.1039/d1ra09334g), 2022-01-01
Supplement: d1ra09334g1.pdf [file d1ra09334g1.pdf]

## Supporting Information

### **The Optimization Effect of Different Parameters on the Super Hydrophobicity of Prickly Shape of Carbonyl Iron Particles**

**Y. Rabbani<sup>1</sup>, M. Shariaty-Niassar<sup>1\*</sup>, S. A. Seyyed Ebrahimi<sup>2</sup>**

*<sup>1</sup> Transport Phenomena & Nanotechnology (TPNT) Lab., School of Chemical Engineering, College of Engineering, University of Tehran, Tehran 111554563, Iran*

*<sup>2</sup> Advanced Magnetic Materials Research Center, School of Metallurgy and Materials, College of Engineering, University of Tehran, Tehran 111554563, Iran*

*\*Corresponding Author's E-mail: mshariat@ut.ac.ir*

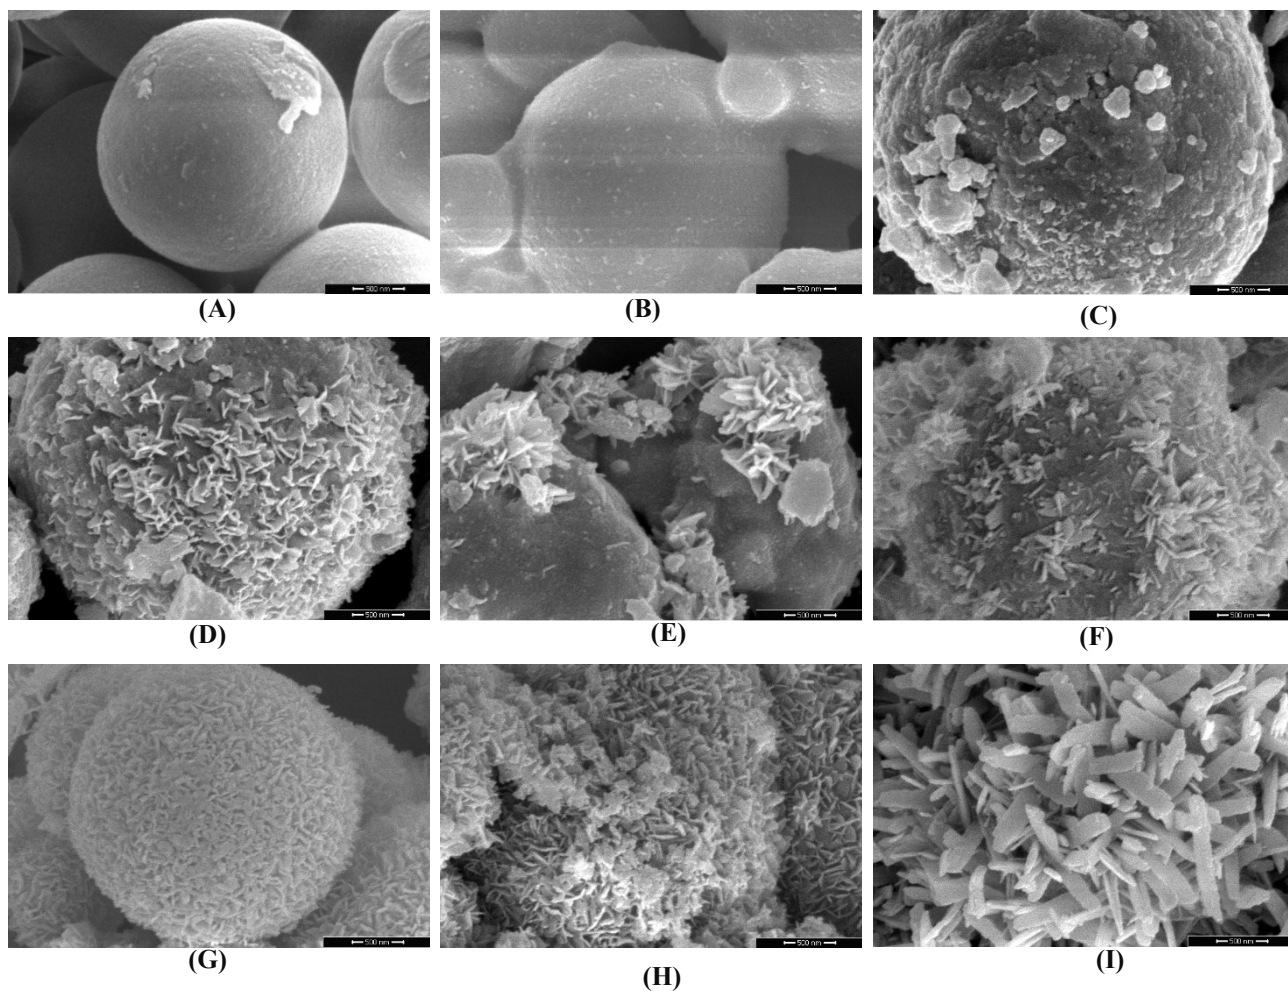

**Figure S1** FESEM images (at 2x magnification) of structural characterization of obtained particles at the different conditions of synthesis A (Run 6), B (Run 3), C (Run 1), D (Run 7), E (Run 19), F (Run 4), G (Run 14), H (Run 15), I (Run 5)
